# Supplementary material
Source: MDPI journal article supplement (https://www.mdpi.com/2227-9040/9/6/135)
Supplement: s1 [file s1]

# Quantum Chemical Studies and Electrochemical Investigations of Polymerized Brilliant Blue-Modified Carbon Paste Electrode for In Vitro Sensing of Pharmaceutical Samples

Pattan-Siddappa Ganesh <sup>1</sup>, Sang-Youn Kim <sup>1,\*</sup>, Savas Kaya <sup>2,\*</sup>, Rajae Salim <sup>3</sup>, Ganesh Shimoga <sup>1</sup> and Seok-Han Lee <sup>1</sup>

- <sup>1</sup> Interaction Laboratory, Future Convergence Engineering, Advanced Technology Research Center, Korea University of Technology and Education, Cheonan-si 31253, Chungcheongnam-do, Korea; ganeshps11@koreatech.ac.kr (P.-S.G.); shimoga@koreatech.ac.kr (G.S.); shlee@koreatech.ac.kr (S.-H.L.)
- <sup>2</sup> Department of Pharmacy, Health Services Vocational School, Sivas Cumhuriyet University, Sivas 58140, Turkey
- <sup>3</sup> Laboratory of Engineering, Organometallic, Molecular and Environment (LIMOME), Faculty of Science, University Sidi Mohamed Ben Abdellah, P.O. Box 1796, 30000 Fez, Morocco; salimrajae@gmail.com
- \* Correspondence: sykim@koreatech.ac.kr (S.-Y.K.); savaskaya@cumhuriyet.edu.tr (S.K.); Tel.: +82-(0)41-560-1484 (S.-Y.K.)

## Supplementary information

**Citation:** Ganesh, P.-S.; Kim, S.-Y.; Kaya, S.; Salim, R.; Shimoga, G.; Lee, S.-H. Quantum Chemical Studies and Electrochemical Investigations of Polymerized Brilliant Blue-Modified Carbon Paste Electrode for In Vitro Sensing of Pharmaceutical Samples. *Chemosensors* **2021**, *9*, 135. <https://doi.org/10.3390/chemosensors9060135>

Academic Editor: Edward P. C. Lai

Received: 30 April 2021

Accepted: 8 June 2021

Published: 10 June 2021

**Publisher's Note:** MDPI stays neutral with regard to jurisdictional claims in published maps and institutional affiliations.

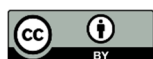

**Copyright:** © 2021 by the authors. Submitted for possible open access publication under the terms and conditions of the Creative Commons Attribution (CC BY) license (<http://creativecommons.org/licenses/by/4.0/>).

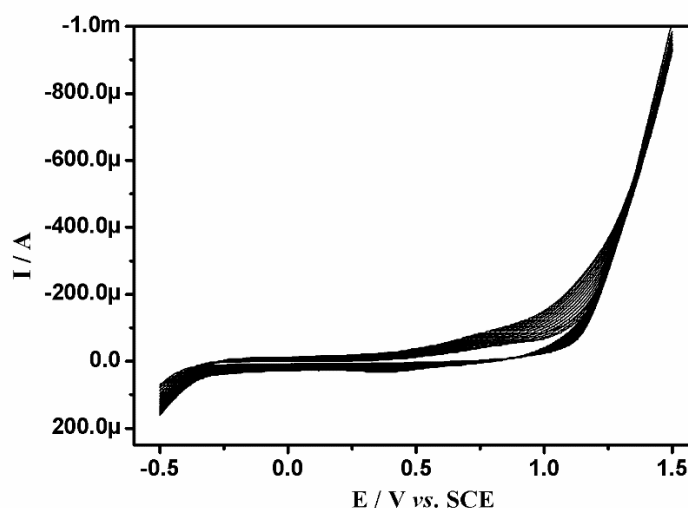

**Figure S1.** CVs obtained for the fabrication of BRB/CPE, 0.5mM solution in 0.1 M NaOH (supporting electrolyte) at 15 successive cycles with scan rate 0.1 Vs<sup>-1</sup>.

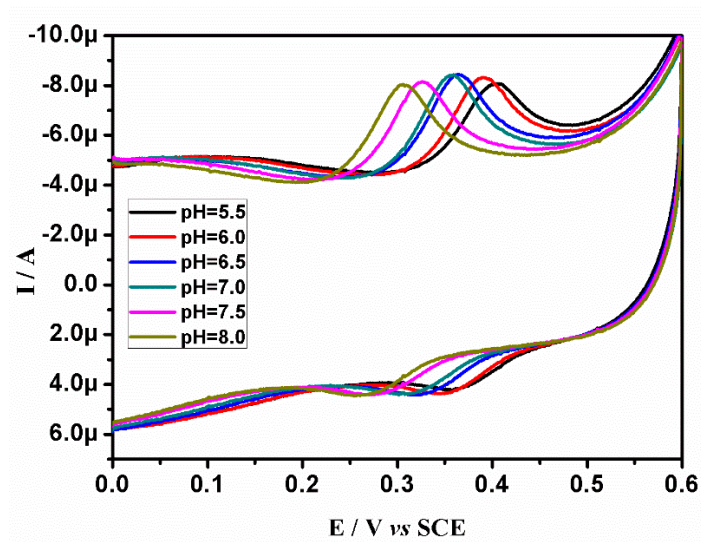

**Figure S2.** CVs obtained for the electro-oxidation of 20.0  $\mu\text{M}$  PA at BRB/CPE in 0.2 M SPBS of different pH, at scan rate of  $0.05\text{Vs}^{-1}$ .

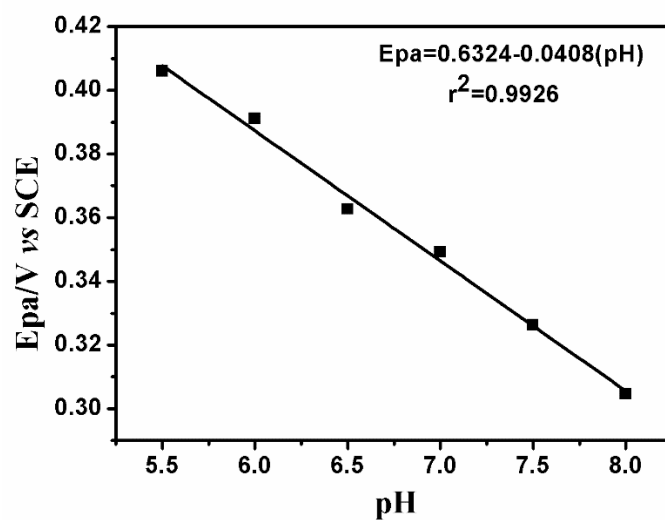

**Figure S3.** Graph of anodic peak potential versus pH of SPBS.
